# Supplementary material for: Validation of Diabetes Risk Scores for Predicting Diabetes Diagnosed by Oral Glucose Tolerance Test
Source: Oxford University Press journal article supplement (doi:10.2337/dc09-1986), 2010-01-26
Supplement: dc09-1986_online_appendix.pdf [file dc09-1986_online_appendix.pdf]

Table. Performance of different Diabetes Risk Scores (DRSs) for prediction of screening-detected diabetes by OGTT

| Diabetes Risk Scores   | ROC area (95% CI) | HL<br>p-value | Optimal<br>cut-off | Sensitivity | Specificity | Correctly<br>classified | LR+  | LR-  | Number of<br>predictors |
|------------------------|-------------------|---------------|--------------------|-------------|-------------|-------------------------|------|------|-------------------------|
| Taiwan DRS             | 0.76 (0.71-0.81)  | 0.3           | 8.872              | 0.71        | 0.72        | 0.72                    | 2.49 | 0.41 | 5                       |
| ARIC DRS (US)          | 0.77 (0.71-0.82)  | 0.3           | 0.130              | 0.78        | 0.63        | 0.64                    | 2.14 | 0.34 | 6                       |
| Cambridge DRS (UK)     | 0.74 (0.69-0.80)  | 0.013         | 0.9886             | 0.65        | 0.72        | 0.71                    | 2.28 | 0.49 | 7                       |
| DRS-Lin                | 0.72 (0.67-0.77)  | <0.0001       | 0.9963             | 0.68        | 0.67        | 0.64                    | 2.09 | 0.52 | 5                       |
| FINDRISC DRS (Finnish) | 0.72 (0.66-0.78)  | 0.4           | 9                  | 0.77        | 0.58        | 0.60                    | 1.84 | 0.40 | 9                       |
| Oman DRS               | 0.72 (0.67-0.77)  | 0.0019        | 12                 | 0.73        | 0.60        | 0.61                    | 1.84 | 0.45 | 6                       |
| Danish DRS             | 0.72 (0.67-0.77)  | 0.3           | 31                 | 0.62        | 0.69        | 0.69                    | 2.01 | 0.55 | 6                       |
| Thai DRS               | 0.72 (0.67-0.78)  | 0.3           | 9                  | 0.74        | 0.62        | 0.63                    | 1.94 | 0.42 | 6                       |
| Asian Indian DRS       | 0.75 (0.71-0.80)  | 0.11          | 31                 | 0.69        | 0.69        | 0.69                    | 2.20 | 0.45 | 6                       |
| Dutch DRS              | 0.68 (0.62-0.74)  | 0.8           | 6                  | 0.55        | 0.73        | 0.71                    | 2.02 | 0.62 | 4                       |
| DESIR DRS (French)     | 0.68 (0.62-0.74)  | 0.11          | 3                  | 0.64        | 0.65        | 0.65                    | 1.81 | 0.56 | 4                       |
